# Supplementary material for: Rosa Roxburghii Tratt Fruit Extract Prevents Dss-Induced Ulcerative Colitis in Mice by Modulating the Gut Microbiota and the IL-17 Signaling Pathway
Source: MDPI journal article supplement (doi:10.3390/nu15214560), 2023-10-27
Supplement: s1 [file s1]

## Supplementary Figure and Table

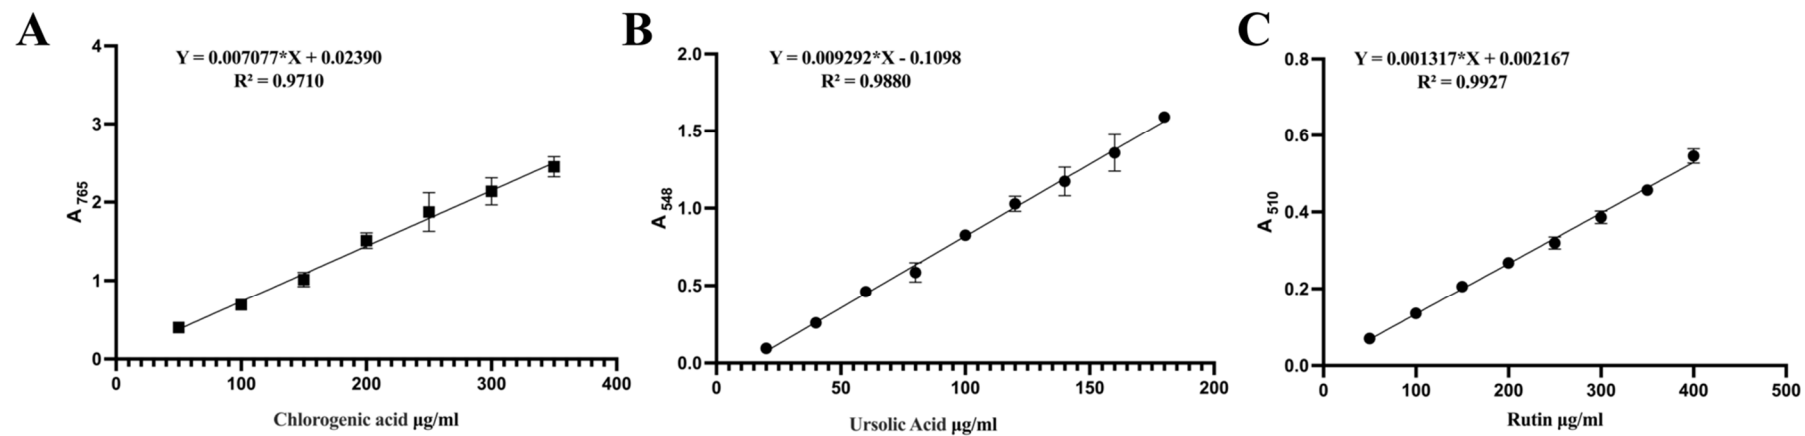

**Supplementary Figure S1.** The standard curves of Chlorogenic acid, Ursolic Acid, and Rutin.

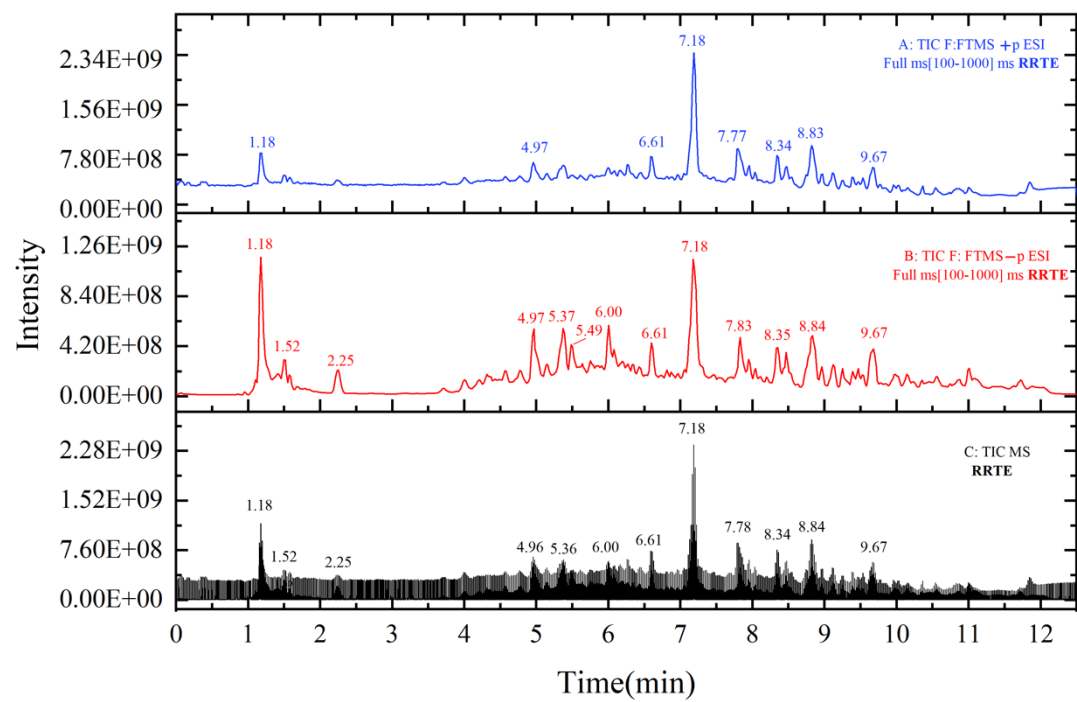

**Supplementary Figure S2** Total ion chromatogram of RRTE.

**Supplementary Table S1** The possible substances in RRTE

| Number | Name                         | Formula                                                      | Molecular<br>weight | Retention<br>Time | Pseudomolecular<br>ion peak                   | Classification  |
|--------|------------------------------|--------------------------------------------------------------|---------------------|-------------------|-----------------------------------------------|-----------------|
| 1      | Arginine                     | C <sub>6</sub> H <sub>14</sub> N <sub>4</sub> O <sub>2</sub> | 174.11158           | 0.939             | [M+H] <sup>+</sup> 175.11877                  | Amino acids     |
| 2      | D-FRUCTOSE                   | C <sub>6</sub> H <sub>12</sub> O <sub>6</sub>                | 180.06325           | 1.025             | [M-H] <sup>-</sup> 179.0559                   | Glycosides      |
| 3      | L-Glutamic acid              | C <sub>5</sub> H <sub>9</sub> NO <sub>4</sub>                | 147.05308           | 1.047             | [M-COOH] <sup>-</sup> 102.5488                | Amino acids     |
| 4      | 5-Hydroxymethylfurfural      | C <sub>6</sub> H <sub>6</sub> O <sub>3</sub>                 | 126.03165           | 1.066             | [M-OH] <sup>-</sup> 109.02846                 | Furan compounds |
| 5      | 2-Pyrrolidinecarboxylic acid | C <sub>5</sub> H <sub>9</sub> NO <sub>2</sub>                | 133.07386           | 1.091             | [M+H-H <sub>2</sub> O] <sup>+</sup> 116.07056 | Amino acids     |
| 6      | D-(-)-Quinic acid            | C <sub>7</sub> H <sub>12</sub> O <sub>6</sub>                | 192.06324           | 1.108             | [M-H] <sup>-</sup> 191.05608                  | Organic acid    |
| 7      | Sucrose                      | C <sub>12</sub> H <sub>22</sub> O <sub>11</sub>              | 342.11588           | 1.272             | [M-H] <sup>-</sup> 341.1086                   | Glycosides      |
| 8      | D-(+)-Malic acid             | C <sub>4</sub> H <sub>6</sub> O <sub>5</sub>                 | 134.02144           | 1.54              | [M-H] <sup>-</sup> 133.0141                   | Organic acid    |
| 9      | Citric acid                  | C <sub>6</sub> H <sub>8</sub> O <sub>7</sub>                 | 192.02694           | 1.55              | [M-H] <sup>-</sup> 191.0196                   | Organic acid    |
| 10     | L-Tyrosine                   | C <sub>9</sub> H <sub>11</sub> NO <sub>3</sub>               | 164.04716           | 1.802             | [M-COOH] <sup>-</sup> 136.07558               | Amino acids     |
| 11     | Meglutol                     | C <sub>6</sub> H <sub>10</sub> O <sub>5</sub>                | 162.05274           | 1.837             | [M-H] <sup>-</sup> 161.04544                  | Amino acids     |
| 12     | Gallic acid                  | C <sub>7</sub> H <sub>6</sub> O <sub>5</sub>                 | 170.02151           | 2.339             | [M-H] <sup>-</sup> 169.01418                  | Polyphenols     |
| 13     | l-ascorbic acid              | C <sub>6</sub> H <sub>8</sub> O <sub>6</sub>                 | 176.03206           | 2.801             | [M+H] <sup>+</sup> 177.03935                  | Vitamins        |
| 14     | (-)-Gallocatechin            | C <sub>15</sub> H <sub>14</sub> O <sub>7</sub>               | 306.07386           | 3.692             | [M-H] <sup>-</sup> 305.06641                  | Polyphenols     |

|    |                                                                                                                   |                                                               |           |       |                                 |                |
|----|-------------------------------------------------------------------------------------------------------------------|---------------------------------------------------------------|-----------|-------|---------------------------------|----------------|
| 15 | Epigallocatechin                                                                                                  | C <sub>15</sub> H <sub>14</sub> O <sub>7</sub>                | 306.07388 | 3.985 | [M-H] <sup>-</sup> 305.0666     | Polyphenols    |
| 16 | Chlorogenic acid                                                                                                  | C <sub>16</sub> H <sub>18</sub> O <sub>9</sub>                | 354.09487 | 4.14  | [M-H] <sup>-</sup> 353.08771    | Polyphenols    |
| 17 | L-Tryptophan                                                                                                      | C <sub>11</sub> H <sub>12</sub> N <sub>2</sub> O <sub>2</sub> | 204.08977 | 4.342 | [M-H] <sup>-</sup> 203.0825     | Amino acids    |
| 18 | (+)-Epicatechin                                                                                                   | C <sub>15</sub> H <sub>14</sub> O <sub>6</sub>                | 290.07892 | 4.491 | [M+H] <sup>+</sup> 291.0863     | Flavanols      |
| 19 | Tryptophan                                                                                                        | C <sub>11</sub> H <sub>12</sub> N <sub>2</sub> O <sub>2</sub> | 204.08969 | 4.502 | [M-H] <sup>-</sup> 203.0825     | Amino acids    |
| 20 | Cryptochlorogenic acid                                                                                            | C <sub>16</sub> H <sub>18</sub> O <sub>9</sub>                | 354.09494 | 4.812 | [M+H] <sup>+</sup> 353.0876     | Polyphenols    |
| 21 | Catechin                                                                                                          | C <sub>15</sub> H <sub>14</sub> O <sub>6</sub>                | 290.07892 | 4.973 | [M-H] <sup>-</sup> 289.07153    | Polyphenols    |
| 22 | Corilagin                                                                                                         | C <sub>27</sub> H <sub>22</sub> O <sub>18</sub>               | 634.0808  | 5.101 | [M-H] <sup>-</sup> 633.07373    | Polyphenols    |
| 23 | Procyanidin B2                                                                                                    | C <sub>30</sub> H <sub>26</sub> O <sub>12</sub>               | 578.16456 | 5.139 | [M-H] <sup>-</sup> 577.15729    | Polyphenols    |
| 24 | (+)-Catechin hydrate                                                                                              | C <sub>15</sub> H <sub>14</sub> O <sub>6</sub>                | 290.07904 | 5.234 | [M-H] <sup>-</sup> 289.07178    | Polyphenols    |
| 25 | p-Coumaric acid                                                                                                   | C <sub>9</sub> H <sub>8</sub> O <sub>3</sub>                  | 164.04739 | 5.27  | [M-COOH] <sup>-</sup> 119.04921 | Phenolic acids |
| 26 | Caffeic acid                                                                                                      | C <sub>9</sub> H <sub>8</sub> O <sub>4</sub>                  | 180.04217 | 5.364 | [M-H] <sup>-</sup> 179.03500    | Organic acid   |
| 27 | (1R,3R,4S,5R)-1,3,4-trihydroxy-5-<br>[(E)-3-(4-hydroxyphenyl)prop-2-<br>enoyl]oxycyclohexane-1-carboxylic<br>acid | C <sub>16</sub> H <sub>18</sub> O <sub>8</sub>                | 338.10020 | 5.414 | [M-H] <sup>-</sup> 337.0929     | Phenolic acids |
| 28 | Quinic acid                                                                                                       | C <sub>7</sub> H <sub>12</sub> O <sub>6</sub>                 | 192.06334 | 5.42  | [M-H] <sup>-</sup> 191.05606    | Polyphenols    |

|    |                                        |                                                 |           |       |                                  |                     |
|----|----------------------------------------|-------------------------------------------------|-----------|-------|----------------------------------|---------------------|
| 29 | Emodin                                 | C <sub>15</sub> H <sub>10</sub> O <sub>5</sub>  | 229.02609 | 5.501 | [M+CAN+H] <sup>+</sup> 271.05991 | Anthraquinones      |
| 30 | Procyanidin B1                         | C <sub>30</sub> H <sub>26</sub> O <sub>12</sub> | 578.14208 | 5.683 | [M+H] <sup>+</sup> 579.1495      | Polyphenols         |
| 31 | Rutin                                  | C <sub>27</sub> H <sub>30</sub> O <sub>16</sub> | 610.1535  | 5.762 | [M-H] <sup>-</sup> 609.14661     | Flavonoids          |
| 32 | Naringenin-7-O-glucoside               | C <sub>21</sub> H <sub>22</sub> O <sub>10</sub> | 434.12144 | 5.829 | [M-H] <sup>-</sup> 433.1136      | Flavonoids          |
| 33 | Naringenin                             | C <sub>15</sub> H <sub>12</sub> O <sub>5</sub>  | 272.06844 | 5.895 | [M+H] <sup>+</sup> 273.07574     | Flavonoids          |
| 34 | Quercetin 7-rhamnoside                 | C <sub>21</sub> H <sub>20</sub> O <sub>11</sub> | 448.10047 | 5.926 | [M-H] <sup>-</sup> 447.05670     | Glycosides          |
| 35 | Quercetin-3β-D-glucoside               | C <sub>21</sub> H <sub>20</sub> O <sub>12</sub> | 464.09546 | 5.936 | [2M-H] <sup>-</sup> 927.18268    | Glycosides          |
| 36 | Kaempferol-7-O-beita-D-glucopyranoside | C <sub>21</sub> H <sub>20</sub> O <sub>11</sub> | 448.10057 | 6.055 | [M-H] <sup>-</sup> 447.056895    | Glycosides          |
| 37 | Quercetin-3-O-xyloside                 | C <sub>20</sub> H <sub>18</sub> O <sub>11</sub> | 434.0848  | 6.15  | [M-H] <sup>-</sup> 433.07645     | Glycosides          |
| 38 | Pinoresinol 4-O-glucoside              | C <sub>26</sub> H <sub>32</sub> O <sub>11</sub> | 520.19472 | 6.153 | [M-H+HAc] <sup>-</sup> 579.20825 | Glycosides          |
| 39 | Cynaroside                             | C <sub>21</sub> H <sub>20</sub> O <sub>11</sub> | 448.10051 | 6.168 | [M+H] <sup>+</sup> 449.10767     | Flavonoids          |
| 40 | Ferulic acid                           | C <sub>10</sub> H <sub>10</sub> O <sub>4</sub>  | 194.05789 | 6.28  | [M-H] <sup>-</sup> 193.05067     | Organic acid        |
| 41 | taxifolin                              | C <sub>15</sub> H <sub>12</sub> O <sub>7</sub>  | 304.05827 | 6.308 | [M-H] <sup>-</sup> 303.05081     | Flavonoids          |
| 42 | Astilbin                               | C <sub>21</sub> H <sub>22</sub> O <sub>11</sub> | 450.11629 | 6.356 | [M-H] <sup>-</sup> 449.10861     | Flavonoids          |
| 43 | Eriodictyol                            | C <sub>15</sub> H <sub>12</sub> O <sub>6</sub>  | 288.06332 | 6.363 | [M+H] <sup>+</sup> 289.07037     | Polyphenols         |
| 44 | Ligustilide                            | C <sub>12</sub> H <sub>14</sub> O <sub>2</sub>  | 190.09931 | 6.397 | [M+H] <sup>+</sup> 191.10652     | Phthalide compounds |

|    |                           |                                                 |           |       |                                  |                        |
|----|---------------------------|-------------------------------------------------|-----------|-------|----------------------------------|------------------------|
| 45 | Phloretin-2'-O-glucoside  | C <sub>21</sub> H <sub>24</sub> O <sub>10</sub> | 436.13699 | 6.435 | [M-H] <sup>-</sup> 435.1297      | Glycosides             |
| 46 | Quillaic acid             | C <sub>30</sub> H <sub>46</sub> O <sub>5</sub>  | 486.33442 | 6.567 | [M-H] <sup>-</sup> 487.34152     | Terpenoids             |
| 47 | Linderalactone            | C <sub>15</sub> H <sub>16</sub> O <sub>3</sub>  | 203.08349 | 6.582 | [M+CAN+H] <sup>+</sup> 245.11734 | Sesquiterpene Lactones |
| 48 | Caffeyl alcohol           | C <sub>9</sub> H <sub>10</sub> O <sub>3</sub>   | 166.06302 | 6.626 | [M-H] <sup>-</sup> 165.05574     | Terpenoids             |
| 49 | 3-phenyllactic acid       | C <sub>9</sub> H <sub>10</sub> O <sub>3</sub>   | 120.05744 | 6.637 | [m+FA-H] <sup>-</sup> 165.05557  | Organic acid           |
| 50 | 18 β-Glycyrrhetintic Acid | C <sub>30</sub> H <sub>46</sub> O <sub>4</sub>  | 470.33927 | 6.667 | [M+H] <sup>+</sup> 471.34613     | Terpenoids             |
| 51 | Tiliroside                | C <sub>30</sub> H <sub>26</sub> O <sub>13</sub> | 297.06863 | 6.787 | [2M+H] <sup>+</sup> 14453        | Glycoside flavonoids   |
| 52 | Dihydrokaempferol         | C <sub>15</sub> H <sub>12</sub> O <sub>6</sub>  | 288.06344 | 6.843 | [M-H] <sup>-</sup> 287.0660      | Flavonoids             |
| 53 | Camphor                   | C <sub>10</sub> H <sub>16</sub> O               | 152.12005 | 6.956 | [M+H] <sup>+</sup> 153.12729     | Terpenoids             |
| 54 | Pedunculoside             | C <sub>36</sub> H <sub>58</sub> O <sub>10</sub> | 696.40883 | 7.138 | [M-H] <sup>-</sup> 659.40137     | Saponins               |
| 55 | Rosamultin                | C <sub>36</sub> H <sub>58</sub> O <sub>10</sub> | 650.40333 | 7.166 | [M+FA-H] <sup>-</sup> 668.4358   | Terpenoids             |
| 56 | Quercetin                 | C <sub>15</sub> H <sub>10</sub> O <sub>7</sub>  | 302.0425  | 7.174 | [M-H] <sup>-</sup> 301.0353      | Flavonoids             |
| 57 | Eupafolin                 | C <sub>16</sub> H <sub>12</sub> O <sub>7</sub>  | 316.05825 | 7.184 | [M-H] <sup>-</sup> 315.0511      | Flavonoids             |
| 58 | Medicagenic acid          | C <sub>30</sub> H <sub>46</sub> O <sub>6</sub>  | 502.32936 | 7.296 | [M+H] <sup>+</sup> 503.33667     | Terpenoids             |
| 59 | Ethyl caffeate            | C <sub>11</sub> H <sub>12</sub> O <sub>4</sub>  | 208.07349 | 7.305 | [M-H] <sup>-</sup> 207.06631     | Polyphenols            |
| 60 | Ursolic acid              | C <sub>30</sub> H <sub>48</sub> O <sub>3</sub>  | 456.36042 | 7.349 | [M- COOH] <sup>-</sup> 411.36230 | Terpenoids             |
| 61 | Naringenin chalcone       | C <sub>15</sub> H <sub>12</sub> O <sub>5</sub>  | 272.06847 | 7.423 | [M-H] <sup>-</sup> 271.0611      | Flavonoids             |

|    |                                                                        |                                                 |           |        |                                             |                |
|----|------------------------------------------------------------------------|-------------------------------------------------|-----------|--------|---------------------------------------------|----------------|
| 62 | Medicagenic acid                                                       | C <sub>30</sub> H <sub>46</sub> O <sub>6</sub>  | 502.32932 | 7.423  | [M-COOH] <sup>-</sup> 457.33136             | Terpenoids     |
| 63 | Ilexsaponin A                                                          | C <sub>36</sub> H <sub>56</sub> O <sub>11</sub> | 664.38209 | 7.435  | [M+NH <sub>4</sub> ] <sup>+</sup> 682.41583 | Saponins       |
| 64 | Ursonic acid                                                           | C <sub>30</sub> H <sub>46</sub> O <sub>3</sub>  | 454.34475 | 7.596  | [M-COOH] <sup>-</sup> 409.34641             | Terpenoids     |
| 65 | 5,6,7-trihydroxy-2-(4-methoxyphenyl)-4H-chromen-4-one<br>(KAEMPFERIDE) | C <sub>16</sub> H <sub>12</sub> O <sub>6</sub>  | 300.06333 | 7.623  | [M+H] <sup>+</sup> 301.07059                | Flavonoids     |
| 66 | Oleanonic acid                                                         | C <sub>30</sub> H <sub>46</sub> O <sub>3</sub>  | 454.34462 | 8.114  | [M+H] <sup>+</sup> 455.35153                | Terpenoids     |
| 67 | Pinocembrin                                                            | C <sub>15</sub> H <sub>12</sub> O <sub>4</sub>  | 256.07346 | 8.41   | [M-H] <sup>-</sup> 255.08613                | Flavonoids     |
| 68 | Wogonin                                                                | C <sub>16</sub> H <sub>12</sub> O <sub>5</sub>  | 284.06838 | 8.666  | [M-H] <sup>-</sup> 283.06107                | Flavonoids     |
| 69 | Lindenol                                                               | C <sub>15</sub> H <sub>18</sub> O <sub>2</sub>  | 230.13079 | 9.417  | [M+H] <sup>+</sup> 231.13805                | Terpenoids     |
| 70 | Maslinic acid                                                          | C <sub>30</sub> H <sub>48</sub> O <sub>4</sub>  | 472.3553  | 10.141 | [M+H] <sup>+</sup> 473.36243                | Terpenoids     |
| 71 | Linolenic acid ethyl ester                                             | C <sub>20</sub> H <sub>34</sub> O <sub>2</sub>  | 306.25569 | 10.271 | [M+H] <sup>+</sup> 306.25569                | Aliphatic acid |
| 72 | Oleanolic acid                                                         | C <sub>30</sub> H <sub>48</sub> O <sub>3</sub>  | 438.35    | 11.833 | [M+H] <sup>+</sup> 439.3572                 | Terpenoids     |

---

**Supplementary Table S2** Sequences of primers used in this study.

| Gene          | Primer sequwnces                                                         |
|---------------|--------------------------------------------------------------------------|
| GAPDH         | F: 5'-ATGGTGAAGGTCGGTGTGAA-3'<br>R: 5'-CCTTGACTGTGCCGTTGAAT-3'           |
| Cxcl 3        | F: 5'-TGAGGCAGTATTCCTTGGCTG-3'<br>R: 5'-ACCGGCATGACCTTGTTTGT-3'          |
| IL-17a        | F: 5'-TGGACTCTCCACCGCAATGAAG-3'<br>R: 5'-GCTTTCCTCCGCATTGACAC-3'         |
| MMP 13        | F: 5'-TTGTGTTTGCAGAGCACTACTTGA-3'<br>R: 5'-AACTGTGGAGGTCAGTAGACTTCTT-3'  |
| MMP 3         | F: 5'-GACGATGATGAACGATGGACAGAGG-3'<br>R: 5'-TGTGGAGGACTTGTAGACTGGGTAC-3' |
| Traf 6        | F: 5'-TACGATGTGGAGTTTGACCCA-3'<br>R: 5'-CACTGCTTCCCGTAAAGCCAT-3'         |
| S100a8        | F: 5'-GACAATGCAATTAAGTTCGAGGAG-3'<br>R: 5'-TGTGGCTGTCTTTGTGAGATGC-3'     |
| SOD 1         | F: 5'-TAACTGAAGGCCAGCATGGGT-3'<br>R: 5'-GGTCTCCAACATGCCTCTCTTC-3'        |
| SOD 2         | F: 5'-CAGACCTGCCTTACGACTATGG-3'<br>R: 5'-GCTGAAGAGCGACCTGAGTTGT -3'      |
| GPX 2         | F: 5'-GAACGAGGAGATCCTGAACAGC-3'<br>R: 5'-GGTAGGGCAGCTTGTCTTTTCAG-3'      |
| PPAR $\gamma$ | F: 5'-CAGGCTTGCTGAACGTGAAG-3'<br>R: 5'-GGAGCACCTTGGCGAACA -3'            |



|               |                                                                          |
|---------------|--------------------------------------------------------------------------|
| S100a9        | F: 5'-GGAAGCACAGTTGGCAACCTTTATG-3'<br>R: 5'-ACCGGCATGACCTTGTTTGT-3'      |
| Lcn2          | F: 5'-GGCTGTCGCTACTGGATCAGAAC-3'<br>R: 5'-CGAACTGGTTGTAGTCCGTGGTG-3'     |
| Hsd17b13      | F: 5'-CAGACCTGCCTTACGACTATGG-3'<br>R: 5'-AACTGTGGAGGTCACGTAGACTTCTT-3'   |
| Akt4          | F: 5'-CATCACTGGTGAGCCACTTGTCC-3'<br>R: 5'-CCGCATCCTTGTACCGTCTTAGC-3'     |
| Cyp2d26       | F: 5'-CAGACCTGCCTTACGACTATGG-3'<br>R: 5'-AACTGTGGAGGTCACGTAGACTTCTT-3'   |
| MUC1          | F: 5'-AGTGCCAAGTCAATACCCTGT-3'<br>R: 5'-CTGGGGTGAAGTGTACTGGA-3'          |
| COX 2         | F: 5'-CTGGTGCCTGGTCTGATGATGTATG-3'<br>R: 5'-GGATGCTCCTGCTTGAGTATGTGCG-3' |
| Occludin      | F: 5'-TGGCTATGGAGGCGGCTATGG-3'<br>R: 5'-AACTGTGGAGGTCACGTAGACTTCTT-3'    |
| IL-6          | F: 5'-CTTCTTGGGACTGATGCTGGTGAC-3'<br>R: 5'-TCTGTTGGGAGTGGTATCCTCTGTG-3'  |
| TNF- $\alpha$ | F: 5'-CGCTCTTCTGTCTACTGAACTTCGG-3'<br>R: 5'-GTGGTTTGTGAGTGTGAGGGTCTG-3'  |
| IL-1 $\beta$  | F: 5'-ATGGTGAAGGTCGGTGTGAA-3'<br>R: 5'-TGTCGTTGCTTGGTTCTCCTTGTAC-3'      |

---

**Supplementary Table S3** Offline data statistics

| Sample | Reads NO. | Bases (bp) | Q30 (bp)   | Q30 (%) |
|--------|-----------|------------|------------|---------|
| HB78   | 41006920  | 6192044920 | 5787181331 | 93.46   |
| HB88   | 39645274  | 5986436374 | 5601663487 | 93.57   |
| HB5    | 46606664  | 7037606264 | 6579323406 | 93.48   |
| MB32   | 40269834  | 6080744934 | 5708059053 | 93.87   |
| MB90   | 38849132  | 5866218932 | 5454412417 | 92.98   |
| MB38   | 40423358  | 6103927058 | 5717318717 | 93.66   |
| CB15   | 42719252  | 6450607052 | 5983472586 | 92.75   |
| CB18   | 40256634  | 6078751734 | 5684456045 | 93.51   |
| CB31   | 45395988  | 6854794188 | 6368425260 | 92.90   |

Reads NO. : Total Reads; Bases (bp): Total number of bases; Q30 (bp): The total number of bases with a base recognition accuracy of over 99.9%; Q30 (%): The percentage of bases with a base recognition accuracy of 99.9% or higher.
